# Supplementary material for: Microbiological Quality and Antimicrobial Resistance of Commercial Probiotic Products for Food-Producing Animals
Source: MDPI journal article supplement (doi:10.3390/antibiotics13020148), 2024-02-01
Supplement: s1 [file s1]

## Article

# Microbiological Quality and Antimicrobial Resistance of Commercial Probiotic Products for Food-Producing Animals

Hoang My Tran <sup>1</sup>, Rangsiya Prathan <sup>2,3</sup>, Si Thu Hein <sup>2,3</sup> and Rungtip Chuanchuen <sup>2,3,\*</sup>

<sup>1</sup> The International Graduate Course of Veterinary Science and Technology (VST), Faculty of Veterinary Science, Chulalongkorn University, Bangkok 10330, Thailand; hoangmy.bsty@gmail.com

<sup>2</sup> Research Unit in Microbial Food Safety and Antimicrobial Resistance, Department of Veterinary Public Health, Faculty of Veterinary Science, Chulalongkorn University, Bangkok 10330, Thailand; rochun.30@gmail.com (R.P.); sithuhein5343@gmail.com (S.T.H.)

<sup>3</sup> Center for Antimicrobial Resistance Monitoring in Foodborne Pathogens (in Cooperation with WHO), Faculty of Veterinary Science, Chulalongkorn University, Bangkok 10330, Thailand

\* Correspondence: chuanchuen.r@gmail.com

## Supplementary Materials

**Table S1.** Primers used for determination of genus and species of probiotic bacteria.

| Primers              | Sequence (5'–3')            | PCR Type                 | PCR Product (bp) | References |
|----------------------|-----------------------------|--------------------------|------------------|------------|
| <i>Bacillus</i>      |                             |                          |                  |            |
| B-K1/F               | TCACCAAGGCRACGATGCG         | All <i>Bacillus</i>      | ~1114            | [34]       |
| B-K1/R1              | CGTATTCACCGCGGCATG          |                          |                  |            |
| <i>Lactobacillus</i> |                             |                          |                  |            |
| R16-1                | CTTGTACACACCGCCCGTCA        | Genus-specificity        | Variable         | [44]       |
| LbLMA1-rev           | CTCAAAACTAAACAAAGTTTC       | Genus-specificity        |                  | [45]       |
| IDL03R               | CCACCTTCCTCCGGTTTGTC        | All <i>Lactobacillus</i> | -                | [46]       |
| IDL04F               | AGGGTGAAGTCGTAACAAGTAGCC    | All <i>Lactobacillus</i> | -                | [46]       |
| IDL11F               | TGGTCGGCAGAGTAACTGTTGTCG    | <i>L. casei</i> -group   | 727              | [46]       |
| IDL22R               | AACTATCGCTTACGCTACCACTTTGC  | <i>L. acidophilus</i>    | 606              | [46]       |
| IDL31F               | CTGTGCTACACCTAGAGATAGGTGG   | <i>L. delbrueckii</i>    | 184              | [46]       |
| IDL42R               | ATTTCAGTTGAGTCTCTCTCTC      | <i>L. gasseri</i>        | 272              | [46]       |
| IDL52F               | ACCTGATTGACGATGGATCACCAGT   | <i>L. reuteri</i>        | 1105             | [46]       |
| DL62R                | CTAGTGGTAACAGTTGATTAAAACTGC | <i>L. plantarum</i>      | 428              | [46]       |
| IDL73R               | GCCAACAAGCTATGTGTTTCGCTTGC  | <i>L. rhamnosus</i>      | 448              | [46]       |
| <i>Enterococcus</i>  |                             |                          |                  |            |
| Ent1                 | TACTGACAAACCATTTCATGATG     | Genus-specificity        | 112              | [47]       |
| Ent2                 | AACTTCGTCACCAACGCGAAC       |                          |                  |            |
| FL1                  | ACTTATGTGACTAACTTAACC       | <i>E. faecalis</i>       | 360              | [48]       |
| FL2                  | TAATGGTGAAATCTTGGTTTGG      |                          |                  |            |
| FM1                  | GAAAAAACAATAGAAGAATTAT      | <i>E. faecium</i>        | 215              | [48]       |
| FM2                  | TGCTTTTTTGAATTCTTCTTTA      |                          |                  |            |
| GA1                  | TTACTTGCTGATTTTGATTTCG      | <i>E. gallinarum</i>     | 173              | [48]       |
| GA2                  | TGAATTCTTCTTTGAAATCAG       |                          |                  |            |
| CA1                  | TCCTGAATTAGGTGAAAAAAC       | <i>E. casseliflavus</i>  | 288              | [48]       |
| CA2                  | GCTAGTTTACCGTCTTTAACG       |                          |                  |            |
| HI1                  | CTTTCTGATATGGATGCTGTC       | <i>E. hirae</i>          | 187              | [48]       |
| HI2                  | TAAATTCTTCCTTAAATGTTG       |                          |                  |            |
| DU1                  | CCTACTGATATTAAGACAGCG       | <i>E. durans</i>         | 295              | [48]       |
| DU2                  | TAATCCTAAGATAGGTGTTTG       |                          |                  |            |
| <i>Clostridium</i>   |                             |                          |                  |            |

|         |                           |                           |      |      |
|---------|---------------------------|---------------------------|------|------|
| 16SA    | GAGAGTTTGATCCTGGCTCAG     | Genus-specificity         | 800  | [49] |
| 16SB    | GTGGACTACCAGGGTATCTAATCC  |                           |      |      |
| CIPER-F | AGATGGCATCATCATTCAAC      | <i>C. perfringens</i>     | 793  | [49] |
| CIPER-R | GCAAGGGATGTCAAGTGT        |                           |      |      |
| CIBIF-F | CAAGTCGAGCGATCTCT         | <i>C. bifermentans</i>    | 564  | [49] |
| CIBIF-R | CCTGCACTCAAGTTCTCT        |                           |      |      |
| CIDIF-F | CTTGAATATCAAAGGTGAGCCA    | <i>C. difficile</i>       | 1085 | [49] |
| CIDIF-R | CTACAATCCGAACTGAGAGTA     |                           |      |      |
| CISOR-F | TCGAGCGACCTTCGG           | <i>C. sordellii</i>       | 944  | [49] |
| CISOR-R | CACCACCTGTCACCAT          |                           |      |      |
| CICLO-F | GAAGTTTTTCGGATGGAATCTTGA  | <i>C. clostridiiforme</i> | 762  | [49] |
| CICLO-R | CACCGAAGGCTTTGCC          |                           |      |      |
| CINEX-F | ATGGCACAGTGTA AAAACTCCG   | <i>C. nexile</i>          | 1054 | [48] |
| CINEX-R | TTGCTTCCCCTCACAGGT        |                           |      |      |
| CISPH-F | GAAGTTTTTCGGACGGATTTTGA   | <i>C. sphenoides</i>      | 1058 | [49] |
| CISPH-R | AGAGTGCCCAACTTGACC        |                           |      |      |
| CIIND-F | GACTGCTTTGGAACTGTGT       | <i>C. indolis</i>         | 369  | [49] |
| CIIND-R | AGGCCCGTTACGGA            |                           |      |      |
| CIINN-F | GGGGGATAATTATGGATCAC      | <i>C. innocuum</i>        | 241  | [49] |
| CIINN-R | GTCGCTGCTCTTTGTGG         |                           |      |      |
| CIRAM-F | GTGACCGTATTAAAAGTGCCT     | <i>C. ramosum</i>         | 298  | [49] |
| CIRAM-R | TACCGTCACTCGGCTAC         |                           |      |      |
| CICOC-F | GTAATACATAAGTAACCTGGCCTTT | <i>C. cocleatum</i>       | 373  | [49] |
| CICOC-R | CTCGGATGTCATTTCCTCC       |                           |      |      |

Table S2. Primers used for detection of AMR genes ( $n = 112$ ).

| Gene                                   | Primer                                 | Primer Sequences (5'–3') | Annealing Temperature (°C) | Product Size (bp) | Reference |
|----------------------------------------|----------------------------------------|--------------------------|----------------------------|-------------------|-----------|
| Beta-lactams                           |                                        |                          |                            |                   |           |
| <i>bla</i> <sub>PSE-1</sub>            | <i>bla</i> <sub>PSE-1</sub> -F         | GCAAGTAGGGCAGGCAATCA     | 55                         | 422               | [50]      |
|                                        | <i>bla</i> <sub>PSE-1</sub> -R         | GAGCTAGATAGATGCTCACAA    |                            |                   |           |
| <i>bla</i> <sub>TEM</sub>              | <i>bla</i> <sub>TEM</sub> -F           | ATCAGTTGGGTGCACGAGTG     | 55                         | 608               | [50]      |
|                                        | <i>bla</i> <sub>TEM</sub> -R           | ATCAGTTGGGTGCACGAGTG     |                            |                   |           |
| <i>bla</i> <sub>SHV</sub>              | <i>bla</i> <sub>SHV</sub> -F           | TTGCCTGTGTATTATCTCCCTG   | 50                         | 854               | [26]      |
|                                        | <i>bla</i> <sub>SHV</sub> -R           | TTAGCGTTGCCAGTGYTG       |                            |                   |           |
| <i>bla</i> <sub>CMY-1</sub>            | <i>bla</i> <sub>CMY-1</sub> -F         | GTGGTGGATGCCAGCATCC      | 58                         | 915               | [26]      |
|                                        | <i>bla</i> <sub>CMY-1</sub> -R         | GGTCGAGCCGGTCTTGTTGAA    |                            |                   |           |
| <i>bla</i> <sub>CMY-2</sub>            | <i>bla</i> <sub>CMY-2</sub> -F         | GCACTTAGCCACCTATACGGCAG  | 58                         | 758               | [26]      |
|                                        | <i>bla</i> <sub>CMY-2</sub> -R         | GCTTTTCAAGAATGCGCCAGG    |                            |                   |           |
| <i>bla</i> <sub>CTX-M universal</sub>  | <i>bla</i> <sub>CTX-M</sub> -MF        | CGATGTGCAGTACCAGTAA      | 60                         | 585               | [19]      |
|                                        | <i>bla</i> <sub>CTX-M</sub> -MR        | AGTGACCAGAATCAGCGG       |                            |                   |           |
| <i>bla</i> <sub>CTX-M group 1</sub>    | <i>bla</i> <sub>CTX-M group1</sub> -IF | TTAGGAARTGTGCCGCTGYA     | 60                         | 688               | [51]      |
|                                        | <i>bla</i> <sub>CTX-M group1</sub> -IR | CGATATCGTTGGTGGTRCCAT    |                            |                   |           |
| <i>bla</i> <sub>CTX-M group 2</sub>    | <i>bla</i> <sub>CTX-M group2</sub> -IF | CGTTAACGGCACGATGAC       | 60                         | 404               | [51]      |
|                                        | <i>bla</i> <sub>CTX-M group2</sub> -IR | CGATATCGTTGGTGGTRCCAT    |                            |                   |           |
| <i>bla</i> <sub>CTX-M group 9</sub>    | <i>bla</i> <sub>CTX-M group9</sub> -IF | TCAAGCCTGCCGATCTGGT      | 60                         | 561               | [51]      |
|                                        | <i>bla</i> <sub>CTX-M group9</sub> -IR | TGATTCTCGCCGCTGAAG       |                            |                   |           |
| <i>bla</i> <sub>CTX-M group 8/25</sub> | <i>bla</i> <sub>CTX-M group8</sub> -IF | AACRCRCAGACGCTCTAC       | 60                         | 326               | [51]      |
|                                        | <i>bla</i> <sub>CTX-M group8</sub> -IR | TCGAGCCGGAASGTGTYAT      |                            |                   |           |
| <i>bla</i> <sub>CTX-M-15</sub>         | <i>bla</i> <sub>CTX-M 15</sub> -IF     | CACACGTGGAATTTAGGGACT    | 56                         | 995               | [52]      |
|                                        | <i>bla</i> <sub>CTX-M 15</sub> -IR     | GCCGTCTAAGGCGATAAACA     |                            |                   |           |
| <i>bla</i> <sub>VEB</sub>              | MultiVEB_for                           | CATTTCCCGATGCAAAGCGT     | 60                         | 648               | [51]      |

|                                  |                                  |                             |    |     |      |
|----------------------------------|----------------------------------|-----------------------------|----|-----|------|
| <i>bla</i> <sub>GES</sub>        | MultiVEB_rev                     | CGAAGTTTCTTTGGACTCTG        | 60 | 399 | [51] |
|                                  | MultiGES_for                     | AGTCGGCTAGACCGGAAAG         |    |     |      |
| <i>bla</i> <sub>PER</sub>        | MultiGES_rev                     | TTTGTCCGTGCTCAGGAT          | 60 | 520 | [51] |
|                                  | MultiPER_for                     | GCTCCGATAATGAAAGCGT         |    |     |      |
| <i>bla</i> <sub>ACC</sub>        | MultiPER_rev                     | TTCGGCTTGACTCGGCTGA         | 60 | 346 | [51] |
|                                  | MultiCaseACC_for                 | CACCTCCAGCGACTTGTAC         |    |     |      |
| <i>bla</i> <sub>FOX</sub>        | MultiCaseACC_rev                 | GTTAGCCAGCATCACGATCC        | 60 | 126 | [51] |
|                                  | MultiCaseFOX_for                 | CTACAGTGCGGGTGGTTT          |    |     |      |
| <i>bla</i> <sub>MOX</sub>        | MultiCaseFOX_rev                 | CTATTTGCGGCCAGGTGA          | 60 | 895 | [51] |
|                                  | MultiCaseMOX_for                 | GCAACAACGACAATCCATCCT       |    |     |      |
| <i>bla</i> <sub>DHA</sub>        | MultiCaseMOX_rev                 | GGGATAGGCGTAACCTCTCCCAA     | 60 | 997 | [51] |
|                                  | MultiCaseDHA_for                 | TGATGGCACAGCAGGATATTC       |    |     |      |
| <i>bla</i> <sub>CIT</sub>        | MultiCaseDHA_rev                 | GCTTTGACTCTTTCGGTATTCTG     | 60 | 538 | [51] |
|                                  | MultiCaseCIT_for                 | CGAAGAGGCAATGACCAGAC        |    |     |      |
| <i>bla</i> <sub>EBC</sub>        | MultiCaseCIT_rev                 | ACGGACAGGGTTAGGATAGY        | 60 | 683 | [51] |
|                                  | MultiCaseEBC_for                 | GGCACCAGATTCAACTTCAAG       |    |     |      |
| <i>bla</i> <sub>OXA-1-like</sub> | MultiCaseEBC_rev                 | GACCCCAAGTTTCCTGTAAGTG      | 60 | 564 | [51] |
|                                  | MultiTSO-O_for                   | GGCACCAGATTCAACTTCAAG       |    |     |      |
| <i>bla</i> <sub>Z</sub>          | MultiTSO-O_rev                   | GACCCCAAGTTTCCTGTAAGTG      | 50 | 421 | [52] |
|                                  | stau- <i>bla</i> <sub>Z</sub> -F | CAAAGATGATATAGTTGCTTATTCTCC |    |     |      |
| <i>mecA</i>                      | stau- <i>bla</i> <sub>Z</sub> -R | TGCTTGACCACTTTTATCAGC       | 60 | 155 | [53] |
|                                  | mecA-F1                          | TGGTATGTGGAAGTTAGATTGGGAT   |    |     |      |
| <i>bla</i> <sub>KPC</sub>        | mecA-R1                          | CTAATCTCATATGTGTTCTGTATTGGC | 52 | 798 | [54] |
|                                  | KPC-Fm                           | CGTCTAGTTCTGCTGTCTTG        |    |     |      |
| <i>bla</i> <sub>NDM</sub>        | KPC-Rm                           | CTTGTCATCCTTGTTAGGCG        | 52 | 621 | [54] |
|                                  | NDM-F                            | GTTTGGCGATCTGGTTTC          |    |     |      |
| <i>bla</i> <sub>OXA-48</sub>     | NDM-R                            | CGGAATGGCTCATCACGATC        | 52 | 438 | [54] |
|                                  | OXA-F                            | GCGTGGTTAAGGATGAACAC        |    |     |      |
| <i>bla</i> <sub>IMP</sub>        | OXA-R                            | CATCAAGTTCAACCCAACCG        | 52 | 232 | [54] |
|                                  | IMP-F                            | GGAATAGAGTGGCTTAAYTCTC      |    |     |      |
| <i>bla</i> <sub>VIM</sub>        | IMP-R                            | GGTTTAAYAAAAACAACCACC       | 52 | 390 | [54] |
|                                  | VIM-F                            | GATGGTGTGTTGGTCGCATA        |    |     |      |
| Quinolones                       | VIM-R                            | CGAATGCGCAGCACCAG           | 53 | 516 | [55] |
|                                  | qnrA-F                           | ATTTCTCACGCCAGGATTTG        |    |     |      |
| <i>qnrA</i>                      | qnrA-R                           | GATCGGCAAAGGTTAGGTCA        | 53 | 469 | [55] |
|                                  | qnrB-F                           | GATCGTGAAAGCCAGAAAGG        |    |     |      |
| <i>qnrB</i>                      | qnrB-R                           | ACGATGCCTGGTAGTTGTCC        | 53 | 417 | [55] |
|                                  | qnrS-F                           | ACGACATTCGTCAACTGCAA        |    |     |      |
| <i>qnrS</i>                      | qnrS-R                           | TAAATTGGCACCCGTGTAGGC       | 60 | 199 | [56] |
|                                  | QepA-F                           | GCAGGTCCAGCAGCGGGTAG        |    |     |      |
| <i>qepA</i>                      | QepA-R                           | CTTCCTGCCCCAGTATCGTG        | 55 | 482 | [22] |
|                                  | AAC(6′)-Ib-F                     | TTGCGATGCTCTATGAGTGGCTA     |    |     |      |
| <i>aac</i> (6′)-Ib-cr            | AAC(6′)-Ib-R                     | CTCGAATGCCTGGCGTGTTC        | 50 | 447 | [57] |
|                                  | qnrC-F                           | GGGTGTACATTTATTGAATC        |    |     |      |
| <i>qnrC</i>                      | qnrC-R                           | TCCACTTTACGAGGTTCT          | 50 | 582 | [21] |
|                                  | qnrD fw                          | CGAGATCAATTTACGGGGAATA      |    |     |      |
| <i>qnrD</i>                      | qnrD rev                         | AACAAGCTGAAGCGCCTG          | 55 | 392 | [58] |
|                                  | oqxAF                            | CTCGGCGCGATGATGCT           |    |     |      |
| <i>oqxA</i>                      | oqxAR                            | CCACTCTTCACGGGAGACGA        | 55 | 512 | [58] |
|                                  | oqxBS                            | TTCTCCCCCGGCGGGAAGTAC       |    |     |      |
| <i>oqxB</i>                      | oqxBa2                           | CTCGGCCATTTTGGCGCGTA        | 57 | 300 | [50] |
|                                  | aadA1-F                          | CTCCGCAGTGGATGGCGG          |    |     |      |
| Aminoglycosides                  | aadA1-R                          | GATCTGCGCGCGAGGCCA          | 55 | 500 | [50] |
|                                  | aadA2-F                          | CATTGAGCGCCATCTGGAAT        |    |     |      |
| <i>aadA2</i>                     | aadA2-R                          | ACATTTGCTCATCGCCGGC         | 57 | 300 | [50] |
|                                  | aadB-F                           | CTAGCTGCGGCAGATGAGC         |    |     |      |

|                          |                  |                              |    |     |      |
|--------------------------|------------------|------------------------------|----|-----|------|
|                          | aadB-R           | CTCAGCCGCCTCTGGGCA           |    |     |      |
| <i>aad(E)</i>            | aadEI            | GCAGAACAGGATGAACGTATTTCG     | 55 | 369 | [59] |
|                          | aadEII           | ATCAGTCGGAACATATGTCCC        |    |     |      |
| <i>aac(6')-aph(2'')</i>  | aac(6')aph(2'')F | CCAAGAGCAATAAGGGCATA         | 60 | 222 | [20] |
|                          | aac(6')aph(2'')R | CACTATCATAACCACTACCG         |    |     |      |
| <i>strA</i>              | strA-F           | TGGCAGGAGGAACAGGAGG          | 57 | 405 | [14] |
|                          | strA-R           | AGGTCGATCAGACCCGTGC          |    |     |      |
| <i>strB</i>              | strB-F           | GCGGACACCTTTTCCAGCCT         | 57 | 621 | [60] |
|                          | strB-R           | TCCGCCATCTGTGCAATGCG         |    |     |      |
| <i>armA</i>              | armA-F           | CCGAAATGACAGTTCCTATC         | 55 | 846 | [61] |
|                          | armA-R           | GAAAAATGAGTGCCTTGGAGG        |    |     |      |
| <i>rmtB</i>              | rmtB-F           | ATGAACATCAACGATGCCCT         | 55 | 769 | [62] |
|                          | rmtB-R           | CCTTCTGATTGGCTTATCCA         |    |     |      |
| <i>aac(3)-I</i>          | aac(3)-I F       | GGGCATCATTTCGCACATGTAGGC     | 64 | 429 | [63] |
|                          | aac(3)-I R       | CATCACTTCTTCCCGTATGCC        |    |     |      |
| <i>aac(3)-II</i>         | aac(3)-II F      | TGAAACGCTGACGGAGCCTC         | 58 | 369 | [64] |
|                          | aac(3)-II R      | GTCGAACAGGTAGCACTGAG         |    |     |      |
| <i>aac(3)-III</i>        | aac(3)-III F     | GTGCATCGCAGCGCAAACCCC        | 64 | 436 | [63] |
|                          | aac(3)-III R     | CAAGCCACTGCACCGCAAACCG       |    |     |      |
| <i>aac(3)-IV</i>         | aac(3)-IV F      | GTGTGCTGCTGGTCCACAGC         | 58 | 628 | [64] |
|                          | aac(3)-IV R      | AGTTGACCCAGGGCTGTGCG         |    |     |      |
| <i>aph(2'')-Ib</i>       | aph2-Ib-F        | CTTGGACGCTGAGATATATGAGCAC    | 55 | 867 | [65] |
|                          | aph2-Ib-R        | GTTTGTAGCAATTCAGAAACACCCTT   |    |     |      |
| <i>aph(2'')-Ic</i>       | aph2-Ic-F        | CCACAATGATAATGACTCAGTTCCC    | 55 | 444 | [65] |
|                          | aph2-Ic-R        | CCACAGCTTCCGATAGCAAGAG       |    |     |      |
| <i>aph(2'')-Id</i>       | aph2-Id-F        | GTGGTTTTTACAGGAATGCCATC      | 55 | 641 | [65] |
|                          | aph2-Id-R        | CCCTCTTCATACCAATCCATATAACC   |    |     |      |
| <i>aph(3')-IIIa</i>      | aph3-IIIa-F      | GGCTAAAATGAGAATATCACCGG      | 55 | 523 | [65] |
|                          | aph3-IIIa-R      | CTTTAAAAAATCATAACAGCTCGCG    |    |     |      |
| <i>ant(4')-Ia (aadD)</i> | ant4-Ia-F        | CAAACCTGCTAAATCGGTAGAAGCC    | 55 | 294 | [65] |
|                          | ant4-Ia-R        | GGAAAGTTGACCAGACATTACGAACT   |    |     |      |
| Chloramphenicol          |                  |                              |    |     |      |
| <i>catA</i>              | catA-F           | CCAGACCGTTCAGCTGGATA         | 55 | 454 | [50] |
|                          | catA-R           | CATCAGCACCTTGTGCGCT          |    |     |      |
| <i>catB</i>              | catB-F           | CGGATTACGCTGACCACC           | 55 | 461 | [50] |
|                          | catB-R           | ATACGCGGTACCTTCCTG           |    |     |      |
| <i>cmlA</i>              | cmlA-F           | TGGACCGCTATCGGACCG           | 57 | 641 | [66] |
|                          | cmlA-R           | CGCAAGACACTTGGGCTGC          |    |     |      |
| <i>florR</i>             | florR-F          | ATGGTGATGCTCGGCGTGGGCCA      | 58 | 800 | [67] |
|                          | florR-R          | GCGCCGTTGGCGGTAACAGACACCGTGA |    |     |      |
| Macrolides               |                  |                              |    |     |      |
| <i>ermA</i>              | ermAI            | TCTAAAAAGCATGTAAAAGAA        | 52 | 645 | [68] |
|                          | ermAII           | CTTCGATAGTTTATTAATATTAGT     |    |     |      |
| <i>ermB</i>              | ermBI            | GAAAAGGTACTCAACCAAATA        | 52 | 638 | [68] |
|                          | ermBII           | AGTAACGGTACTTAAATTGTTTAC     |    |     |      |
| <i>ermC</i>              | ermCI            | TCAAAACATAATATAGATAAA        | 52 | 643 | [68] |
|                          | ermCII           | GCTAATATTGTTTAAATCGTCAAT     |    |     |      |
| <i>mefA</i>              | mef(A)-FW        | CAATATGGGCAGGGCAAG           | 62 | 317 | [28] |
|                          | mef(A)-RW        | AAGCTGTTCCAATGCTACGG         |    |     |      |
| <i>mph(A)</i>            | mphAF            | GTGAGGAGGAGCTTCGCGAG         | 60 | 403 | [69] |
|                          | mphAR            | TGCCGAGGACTCGGAGGTC          |    |     |      |
| <i>mph(B)</i>            | mphBF            | GATATTAAACAAGTAATCAGAATAG    | 58 | 494 | [69] |
|                          | mphBR            | GCTCTTACTGCATCCATACG         |    |     |      |
| <i>mph(C)</i>            | mphCF            | ATGACTCGACATAATGAAAT         | 45 | 900 | [70] |
|                          | mphCR            | CTACTCTTTCATACCTAACTC        |    |     |      |
| <i>ere(A)</i>            | ereAF            | GCCGGTGCTCATGAACCTTGAG       | 60 | 420 | [69] |
|                          | ereAR            | CGACTCTATTCGATCAGAGGC        |    |     |      |
| <i>ere(B)</i>            | ereBF            | TTGGAGATACCCAGATTGTAG        | 55 | 537 | [69] |

|               |           |                               |    |      |      |
|---------------|-----------|-------------------------------|----|------|------|
| <i>ermF</i>   | ereBR     | GAGCCATAGCTTCAACGC            | 50 | 466  | [71] |
|               | F1        | CGGGTCAGCACTTTACTATTG         |    |      |      |
| <i>msrA</i>   | F2        | GGACCTACCTCATAGACAAG          | 60 | 940  | [72] |
|               | msrA F    | GGCACAATAAGAGTGTTTAAAGG       |    |      |      |
| <i>msrB</i>   | msrA R    | AAGTTATATCATGAATAGATTGTCCTGTT | 60 | 595  | [72] |
|               | msrB F    | TATGATATCCATAATAATTATCCAATC   |    |      |      |
| <i>ermTR</i>  | msrB R    | AAGTTATATCATGAATAGATTGTCCTGTT | 47 | 531  | [73] |
|               | TR3       | CAATAAACAAGATAAAATAATAG       |    |      |      |
|               | TR4       | CTTTTGTAGTCCTTCTTTAA          |    |      |      |
| Trimethoprim  |           |                               |    |      |      |
| <i>dfrA1</i>  | dfrA1-F   | CAATGGCTGTTGGTTGGAC           | 55 | 254  | [50] |
|               | dfrA1-R   | CCGGCTCGATGTCTATTGT           |    |      |      |
| <i>dfrA10</i> | dfrA10-F  | TCAAGGCAAATTACCTTGGC          | 57 | 432  | [61] |
|               | dfrA10-R  | ATCTATTGGATCACCTACCC          |    |      |      |
| <i>dfrA12</i> | dfrA12-F  | TTCGCAGACTCACTGAGGG           | 55 | 330  | [50] |
|               | dfrA12-R  | CGGTTGAGACAAGCTCGAAT          |    |      |      |
| <i>dfrA5</i>  | dfr5-f    | AGCTACTCTTTAAAGCCTTGACGTA     | 55 | 341  | [74] |
|               | dfr5-r    | GTGTTGCTCAAAAACAACCTCG        |    |      |      |
| <i>dfrA7</i>  | dfr7&17-f | ACATTTGACTCTATGGGTGTTCTTC     | 55 | 227  | [74] |
|               | dfr7-r    | ACCTCAACGTGAACAGTAGACAAAT     |    |      |      |
| <i>dfrA17</i> | dfr7&17-f | ACATTTGACTCTATGGGTGTTCTTC     | 55 | 171  | [74] |
|               | dfr17-r   | TCTCTGGCGGGGTCAAATCTAT        |    |      |      |
| <i>dfrA14</i> | dfrA14-F  | TTAACCCAGGATGAGAACCT          | 52 | 510  | [75] |
|               | dfrA14-R  | CGATTGCATAGCTTTGTAA           |    |      |      |
| <i>dfr18</i>  | dfr18-F   | TGGGTAAGACACTCGTCATGGG        | 43 | 389  | [76] |
|               | dfr18-R   | ACTGCCGTTTTTCGATAATGTGG       |    |      |      |
| <i>dfrA8</i>  | dfrA8-F   | GAGCTTCCGGGTGTTTCGTGAC        | 55 | 247  | [77] |
|               | dfrA8-R   | CTTCCATGCCATTCTGCTCGTAGT      |    |      |      |
| Sulfonamides  |           |                               |    |      |      |
| <i>sul1</i>   | Sul1-F    | CGGACGCGAGGCCTGTATC           | 57 | 591  | [66] |
|               | Sul1-R    | GGGTGCGGACGTAGTCAGC           |    |      |      |
| <i>sul2</i>   | sul2-F    | GCGCAGGCGCGTAAGCTGAT          | 57 | 514  | [61] |
|               | sul2-R    | CGAAGCGCAGCCGCAATTC           |    |      |      |
| <i>sul3</i>   | sul3-F    | GGGAGCCGCTTCCAGTAAT           | 57 | 500  | [66] |
|               | sul3-R    | TCCGTGACACTGCAATCATT          |    |      |      |
| Tetracyclines |           |                               |    |      |      |
| <i>tetA</i>   | tetA-F    | GCTGTCGGATCGTTTCGG            | 55 | 658  | [50] |
|               | tetA-R    | CATTCCGAGCATGAGTGCC           |    |      |      |
| <i>tetB</i>   | tetB-F    | CTGTGCGGCATCGGTCAT            | 55 | 615  | [50] |
|               | tetB-R    | CAGGTAAAGCGATCCCACC           |    |      |      |
| <i>tetK</i>   | tetKI     | TTGAGCTGTCTTGGTTCA            | 50 | 352  | [14] |
|               | tetKII    | CAATACCTACGATATCTA            |    |      |      |
| <i>tetL</i>   | tet(L)I   | TGGTCCTATCTTCTACTCATTC        | 53 | 385  | [78] |
|               | tet(L)II  | TTCCGATTTTCGGCAGTAC           |    |      |      |
| <i>tetM</i>   | tet(M)I   | GGTGAACATCATAGACACGC          | 55 | 401  | [78] |
|               | tet(M)II  | CTTGTTTCGAGTTCCAATGC          |    |      |      |
| <i>tetO</i>   | tet(O)I   | AGCGTCAAAGGGGAATCACTATCC      | 55 | 1723 | [14] |
|               | tet(O)II  | CGGCGGGGTTGGCAAATA            |    |      |      |
| <i>tetS</i>   | tet(S)I   | ATCAAGATATTAAGGAC             | 55 | 573  | [79] |
|               | tet(S)II  | TTCTCTATGTGGTAATC             |    |      |      |
| <i>tetW</i>   | TetW-FW   | GAGAGCCTGCTATATGCCAGC         | 52 | 168  | [80] |
|               | TetW-RW   | GGGCGTATCCACAATGTTGAC         |    |      |      |
| <i>tet(C)</i> | tetC-F    | CTTGAGAGCCTTCAACCCAG          | 55 | 418  | [81] |
|               | tetC-R    | ATGGTCGTCATCTACCTGCC          |    |      |      |
| <i>tet(D)</i> | tetD-F    | AAACCATTACGGCATTCTGC          | 55 | 787  | [81] |
|               | tetD-R    | GACCGGATACACCATCCATC          |    |      |      |
| <i>tet(E)</i> | tetE-F    | AAACCACATCCTCCATACGC          | 55 | 278  | [81] |
|               | tetE-R    | AAATAGGCCACAACCGTCAG          |    |      |      |

|                       |           |                         |    |      |      |
|-----------------------|-----------|-------------------------|----|------|------|
| <i>tet</i> (G)        | tetG-F    | GCTCGGTGGTATCTCTGCTC    | 55 | 468  | [81] |
|                       | tetG-R    | AGCAACAGAATCGGGAACAC    |    |      |      |
| <i>tet</i> (Q)        | tetQ-F    | TTATACTTCCTCCGGCATCG    | 55 | 904  | [81] |
|                       | tetQ-R    | ATCGGTTTCGAGAATGTCCAC   |    |      |      |
| <i>tet</i> (X)        | tetX-F    | CAATAATTGGTGGTGGACCC    | 55 | 468  | [81] |
|                       | tetX-R    | TTCTTACCTTGGACATCCCG    |    |      |      |
| <i>tet</i> (30)       | tet(30)-F | CCGTCATGCAATTTGTGTTC    | 60 | 550  | [82] |
|                       | tet(30)-R | TAGAGCACCCAGATCGTTCC    |    |      |      |
| <i>tet</i> (32)       | tet(32)-F | GAACCAGATGCTGCTCTT      | 57 | 620  | [83] |
|                       | tet(32)-R | CATAGCCACGCCACATGAT     |    |      |      |
| <i>tet</i> (O/W/32/O) | tetWF     | GGAGGAAAATACCGACATA     | 50 | 729  | [84] |
|                       | tet32R    | CTCTTTCATAGCCACGCC      |    |      |      |
| Polymyxins            |           |                         |    |      |      |
| <i>mcr-1</i>          | MCR1-IF   | AGTCCGTTTGTCTTGTGGC     | 58 | 320  | [85] |
|                       | MCR1-IR   | AGATCCTTGGTCTCGGCTTG    |    |      |      |
| <i>mcr-2</i>          | MCR2-IF   | CAAGTGTGTGGTGCAGTT      | 58 | 715  | [85] |
|                       | MCR2-IR   | TCTAGCCCCGACAAGCATACC   |    |      |      |
| <i>mcr-3</i>          | MCR3-IF   | AAATAAAAAATTGTTCGCTTATG | 58 | 929  | [85] |
|                       | MCR3-IR   | AATGGAGATCCCCGTTTTT     |    |      |      |
| <i>mcr-4</i>          | MCR4-IF   | TCACTTTCATCACTGCGTTG    | 58 | 1116 | [85] |
|                       | MCR4-IR   | TTGGTCCATGACTACCAATG    |    |      |      |
| <i>mcr-5</i>          | MCR5-IF   | ATGCGGTTGTCTGCATTTATC   | 58 | 1644 | [85] |
|                       | MCR5-IR   | TCATTGTGGTTGTCTTTTCTG   |    |      |      |
| <i>mcr-6</i>          | MCR-6F    | GTCCGGTCAATCCCTATCTGT   | 55 | 556  | [86] |
|                       | MCR-6R    | ATCACGGGATTGACATAGCTAC  |    |      |      |
| <i>mcr-7</i>          | MCR-7F    | TGCTCAAGCCCTTCTTTTCGT   | 55 | 894  | [86] |
|                       | MCR-7R    | TTCATCTGCGCCACCTCGT     |    |      |      |
| <i>mcr-8</i>          | MCR-8F    | AACCGCCAGAGCACAGAATT    | 60 | 667  | [86] |
|                       | MCR-8R    | TTCCCCCAGCGATTCTCCAT    |    |      |      |
| Vancomycin            |           |                         |    |      |      |
| <i>vanA</i>           | vanA1     | GGGAAAACGACAATTGC       | 54 | 732  | [87] |
|                       | vanA2     | GTACAATGCGGCCGTTA       |    |      |      |
| <i>vanB</i>           | vanB1     | ATGGGAAGCCGATAGTC       | 54 | 635  | [87] |
|                       | vanB2     | GATTTTCGTTCCCTCGACC     |    |      |      |
| <i>vanC</i>           | vanC1     | GGTATCAAGGAAACCTC       | 54 | 822  | [87] |
